# Supplementary material for: A Comparison Between Two Screening Approaches for ASD Among Toddlers in Israel
Source: Springer Nature journal article supplement (doi:10.1007/s10803-018-3711-x), 2018-08-11
Supplement: MOESM1 [file 16029132]

**Supplementary Material - Global Development Screening (GDS) items for 9-36 months.**

Toddlers in Israel undergo global developmental screening (GDS) by nurses at government-funded maternal child health centers (MCHCs). The GDS is performed at each visit in the MCHC (i.e. at ages 3, 6, 9, 12, 18, 24, 36, 48, and 60 months) and includes 4-9 items that assess different age appropriate developmental skills in the areas of: gross motor, fine motor, language and communication, and emotional-social domain which are examined through interview of the parent, or direct observation of the child. Below are listed the items that were assessed in this study:

**9 to 12 months**

- Say one word or make significant voices
- Sits by himself
- Sets himself up from sitting to standing
- Capable of pincer grip
- Understand simple instructions
- Produces voices in a dialogue

**12 to 18 months**

- Walking with help
- Familiar with at least one body part
- Say 2-3 words
- Pointing on request on familiar objects
- Expressing desires in gesture or words
- Makes eye contact while playing a game

**18 to 24 months**

- Walking without help
- Climbing stairs with help
- Building a tower cubes
- Feeding himself with a spoon
- Has a vocabulary of over than 10 words
- Perking the lips to give a kiss
- Combines 2 or more words for a sentence

**24 to 36 months**

- Understands actions and parts of speech
- Describes situations in words
- Free expression
- Running without falling
- Going up and down the stairs without help
- Copy vertical/horizontal lines and round shapes
- Speech is used for communication purposes
- Composes a 3-words sentence
- Participates in daily activities
